# Supplementary material for: Stable neodymium gallium oxide (Nd3Ga5O12 and Nd3GaO6) phases: a study on their asymmetric supercapacitor applications
Source: Royal Society of Chemistry journal article supplement (doi:10.1039/d4dt03103b), 2024-11-27
Supplement: d4dt03103b1.pdf [file d4dt03103b1.pdf]

**Stable Neodymium Gallium Oxide ( $\text{Nd}_3\text{Ga}_5\text{O}_{12}$  and  $\text{Nd}_3\text{GaO}_6$ ) phases: A study for  
Asymmetric Supercapacitor Applications**

Govarthini Seerangan Selvam<sup>a</sup>, Jesman Sthevan Kovil Pitchai<sup>b</sup>, Balaji Krishnasamy<sup>c</sup>, Ramesh  
Rajendran<sup>d</sup>, Thangaraju Dheivasigamani<sup>a\*</sup>

*<sup>a</sup>Nano-crystal Design and Application Lab (n-DAL), Department of Physics, PSG Institute of  
Technology and Applied Research, Coimbatore-641062, Tamil Nadu, India.*

*<sup>b</sup>Solid State Ionics Lab, PG & Research Department of Physics, Thanthai Periyar Government  
Arts and Science College (Autonomous), (Affiliated to Bharathidasan University),  
Tiruchirappalli-620023, Tamil Nadu, India.*

*<sup>c</sup> Department of Chemistry, PSG Institute of Technology and Applied Research, Coimbatore-  
641062, Tamil Nadu, India.*

*<sup>d</sup>Department of Physics, Periyar University, Salem-636011, Tamil Nadu, India.*

**The corresponding author\***

Thangaraju Dheivasigamani ([dthangaraju@gmail.com](mailto:dthangaraju@gmail.com))

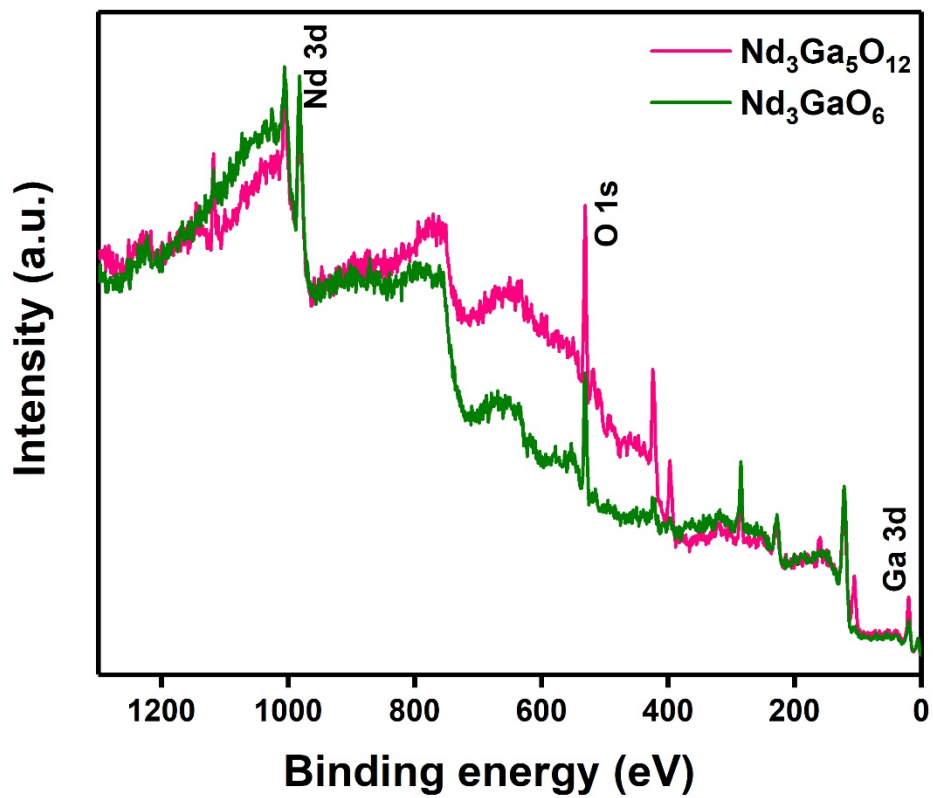

Figure S1. XPS survey scan spectra of as-synthesized  $\text{Nd}_3\text{Ga}_5\text{O}_{12}$  and  $\text{Nd}_3\text{GaO}_6$

**Table S1: Electrochemical performance comparison of as-synthesised Nd<sub>3</sub>Ga<sub>5</sub>O<sub>12</sub> with reported rare earth garnets:**

| S.No | Electrode Material                              | Electrolyte | Specific Capacitance    | Ref       |
|------|-------------------------------------------------|-------------|-------------------------|-----------|
| 1    | Eu <sub>3</sub> Ga <sub>5</sub> O <sub>12</sub> | 3M KOH      | 303 Cg <sup>-1</sup>    | 20        |
| 2    | Gd <sub>3</sub> Ga <sub>5</sub> O <sub>12</sub> | 3M KOH      | 180 Cg <sup>-1</sup>    | 20        |
| 3    | Dy <sub>3</sub> Ga <sub>5</sub> O <sub>12</sub> | 3M KOH      | 256 Cg <sup>-1</sup>    | 20        |
| 4    | Er <sub>3</sub> Ga <sub>5</sub> O <sub>12</sub> | 3M KOH      | 216 Cg <sup>-1</sup>    | 20        |
| 5    | Yb <sub>3</sub> Ga <sub>5</sub> O <sub>12</sub> | 3M KOH      | 261 Cg <sup>-1</sup>    | 20        |
| 6    | Sm <sub>3</sub> Ga <sub>5</sub> O <sub>12</sub> | 3M KOH      | 91.95mAhg <sup>-1</sup> | 19        |
| 7    | Lu <sub>3</sub> Ga <sub>5</sub> O <sub>12</sub> | 3M KOH      | 658 Fg <sup>-1</sup>    | 21        |
| 8    | Nd <sub>3</sub> Ga <sub>5</sub> O <sub>12</sub> | 3M KOH      | 418 Fg <sup>-1</sup>    | This work |
